# Supplementary material
Source: HighWire-hosted journal article supplement (https://erj.ersjournals.com/content/54/1/1800174)
Supplement: inline-supplementary-material-1 [file inline-supplementary-material-1.pdf]

# **IL-22 and its receptors are increased in human and experimental COPD and contribute to pathogenesis**

Malcolm R. Starkey<sup>1</sup>, Maximilian W. Plank<sup>1</sup>, Paolo Casolari<sup>2</sup>, Alberto Papi<sup>2</sup>, Stelios Pavlidis<sup>3</sup>, Yike Guo<sup>3</sup>, Guy J.M. Cameron<sup>1</sup>, Tatt Jhong Haw<sup>1</sup>, Anthony Tam<sup>4,5</sup>, Ma'en Obiedat<sup>4,5</sup>, Chantal Donovan<sup>1</sup>, Nicole G. Hansbro<sup>1,6</sup>, Duc H. Nguyen<sup>1</sup>, Prema Mono Nair<sup>1</sup>, Richard Y. Kim<sup>1</sup>, Jay C. Horvat<sup>1</sup>, Gerard E. Kaiko<sup>1</sup>, Scott K. Durum<sup>5</sup>, Peter A. Wark<sup>1</sup>, Don D. Sin<sup>4,5</sup>, Gaetano Caramori<sup>8</sup>, Ian M. Adcock<sup>3</sup>, Paul S. Foster<sup>1</sup> and Philip M. Hansbro<sup>1,6</sup>

**Affiliations:** <sup>1</sup>Priority Research Centre for Healthy Lungs, School of Biomedical Sciences and Pharmacy, Hunter Medical Research Institute & University of Newcastle, Callaghan, New South Wales, Australia. <sup>2</sup>Interdipartimental Study Center for Inflammatory and Smoke-related Airway Diseases (CEMICEF), Cardiorespiratory and Internal Medicine Section, University of Ferrara, Ferrara, Italy. <sup>3</sup>The Airways Disease Section, National Heart & Lung Institute, Imperial College London, London, UK. <sup>4</sup>The University of British Columbia Center for Heart Lung Innovation, St Paul's Hospital, Vancouver, Canada. <sup>5</sup>Respiratory Division, Department of Medicine, University of British Columbia, Vancouver, BC. <sup>6</sup>Centre for inflammation, Centenary Institute, Sydney, and School of Life Sciences, University of Technology, Ultimo, NSW, Australia. <sup>6</sup>Centre for inflammation, Centenary Institute, Sydney, and School of Life Sciences, University of Technology, Ultimo, NSW, Australia. <sup>7</sup>Laboratory of Immunoregulation, Cancer and Inflammation Program, Center for Cancer Research, National Cancer Institute, National Institutes of Health, Frederick, MD, USA. <sup>8</sup>UOC di

Pneumologia, Dipartimento di Scienze Biomediche, Odontoiatriche e delle Immagini Morfologiche e Funzionali (BIOMORF), Università di Messina, Italy.

**Correspondence:** Professor Philip M. Hansbro, Centre for inflammation, Centenary Institute, Sydney, and School of Life Sciences, University of Technology, Ultimo, NSW, Australia. E-mail: [p.hansbro@centenary.org.au](mailto:p.hansbro@centenary.org.au)

## Supplementary methods

**Ethics statement.** This study was performed in accordance with the recommendations issued by the National Health and Medical Research Council of Australia. All experimental protocols were approved by the animal ethics committee of The University of Newcastle, Australia.

**Gene Expression in Human COPD Microarray Datasets.** Analysis of IL-22, IL-22RA1 IL-10RB and IL-22RA2 in published human array datasets (Affymetrix Human Genome U133 Plus 2.0 Array, Accession numbers: GSE5058 and GSE27597) [1-3] was performed using the Array Studio software (Omicsoft Corporation, Research Triangle Park, NC, USA) by applying a general linear model adjusting for age and gender and the Benjamini–Hochberg method for p-value adjustment. Data are expressed as  $\log_2$  intensity robust multi-array average signals. The Benjamini–Hochberg method for adjusted P value/false discovery rate (FDR) was used to analyse differences between two groups. Statistical significance was set at  $FDR < 0.05$ .

In the GSE5058 dataset, gene arrays from small airway epithelial cells obtained from normal non-smokers (n = 12), healthy chronic smokers (n = 12),

smokers with early COPD (n=9), and smokers with established COPD (n = 6) were evaluated. The FEV1/FVC ratio of the subjects in these groups were  $99 \pm 7$ ,  $97 \pm 7$ ,  $78 \pm 4$  and  $66 \pm 14$ , respectively.

In the GSE27597 dataset, gene arrays from 8 sample pairs from different lung slices from 6 subjects requiring lung transplant for COPD and 2 organ donors were analysed. The 6 subjects with COPD had a FEV1 <25% predicted (severe disease).

In addition, we examined gene expression from lung tissue specimens derived from 56 subjects (GSE8581 [4]). These subjects had undergone lobectomy for removal of a suspected tumour. Tissue was derived from histologically normal tissue distant from the tumour margin. COPD (cases, n = 15) were defined as subjects with FEV1<70% and FEV1/FVC<0.7 and controls (n = 18) as subjects with FEV1>80% and FEV1/FVC>0.7.

**Mice.** Female, 7-8-week-old, wild-type (WT) C57BL/6, *Il17a<sup>eGFP/+</sup>;Il22<sup>td-tomato/+</sup>* reporter and *Il22<sup>-/-</sup>* mice were obtained from the Australian Bioresource Facility, Moss Vale, NSW, Australia. *Il17a<sup>eGFP/+</sup>;Il22<sup>td-tomato/+</sup>* dual reporter and *Il22<sup>-/-</sup>* and mice were generated as previously described [5]. Mice were housed under a 12-hour light/dark cycle and had free access to food (standard chow) and water. After a period of acclimatization (5 days), mice were randomly placed into experimental groups and exposed to either normal air or nose-only inhalation of CS for eight weeks as described previously [6-13].

**Isolation of RNA and qPCR.** Total RNA was extracted from whole lung tissue and blunt-dissected airways and parenchyma and reversed transcribed [8]. mRNA

transcripts were determined by real-time quantitative PCR (qPCR, ABIPrism7000, Applied Biosystems, Scoresby, Victoria, Australia) using custom designed primers (Integrated DNA Technologies, Baulkham Hills, New South Wales, Australia), normalized to the reference gene hypoxanthine-guanine phosphoribosyltransferase (*hprt*) (**supplementary table S1**).

**Flow Cytometry Analysis.** The numbers of IL-17A<sup>+</sup> and IL-22<sup>+</sup> CD4<sup>+</sup> T-cells,  $\gamma\delta$  T-cells, NKT-cells and group 3 innate lymphoid cells in lung homogenates were determined based on surface marker expression using flow cytometry (**supplementary table S2**) [14-16]. Flow cytometric analysis was performed using a FACSAriaIII with FACSDiva software (BD Biosciences, North Ryde, Australia). Flow cytometry antibodies were purchased from Biolegend (Karrinyup, Western Australia, Australia) or BD Biosciences (**supplementary table S3**). BD compensation beads (BD Biosciences) were used to compensate for spectral overlap.

**Mouse lung IHC.** Lungs were perfused, inflated, formalin fixed, paraffin embedded, and sectioned (4 $\mu$ m)[8, 9]. Longitudinal sections of the left lung were deparaffinised by placing on a heating block at 70°C for 15mins then sections were immersed in fresh xylene for 10mins then 5mins. Rehydration was performed using a series of ethanol gradients (100% twice, 90%, 80%, 70%) and 0.85% saline for 5mins each. Heat-induced antigen retrieval was performed in citrate buffer (10mM citric acid, 0.05% Tween 20, pH 6.0) at 100°C for 30mins. Sections were blocked with casein blocker (Thermo Fisher Scientific, Scoresby, Victoria, Australia) for 1h. Sections were washed with PBS-T and incubated overnight at 4°C with either rat anti-IL22ra1

(MAB42941; R&D Systems, Minneapolis, Minnesota, United States) or rabbit anti-Il22ra2 (ab203211; Abcam, Melbourne, Victoria, Australia) antibodies. Following washing with PBS-T, sections were incubated for 30mins at 37°C with either goat anti-rat (HAF005; R&D Systems) or goat-anti-rabbit (ab7090; Abcam) secondary antibodies conjugated to horseradish peroxidase. Each primary and secondary antibody was diluted 1:100 in PBS-T. Following washing with PBS-T, sections were incubated for 20 mins with 3,3'-diaminobenzidine chromogen-substrate buffer (Aligent Technologies, Mulgrave, Victoria, Australia) according to the manufacturer's instructions. Sections were washed with ddH<sub>2</sub>O then counterstained with standard haematoxylin for 5mins. Sections were washed with tap H<sub>2</sub>O and were dehydrated by immersion in a series of saline, ethanol then xylene, inverse to that described above. Coverslips were mounted with standard non-aqueous medium and slides imaged using a Zeiss Axio microscope with ZEN-blue edition software V2.5 (Carl Zeiss Microscopy, Thornwood, New York, United States). Unless otherwise stated, each incubation was at room temperature protected from light in a humidified chamber. All wash steps were performed 5 times for 3mins each.

**Airway remodelling.** Airway epithelial ( $\mu\text{m}^2$ ) and collagen deposition area ( $\mu\text{m}^2$ ) were assessed in a minimum of four small airways (basement membrane [BM] perimeter <1,000 $\mu\text{m}$ ) per section [7-9, 12, 13]. Lung sections were stained using Masson's trichrome stain, and photographs of small intact airways were taken at 40x magnification. These photographs were then analysed in ImageJ software (Version 1.50, NIH).

Airway epithelial thickness analysis was performed by carefully tracing the BM and inner epithelial surface perimeters. Airway epithelial area was calculated by

subtracting the inner airway area from the outer airway area. This was then expressed as area per  $\mu\text{m}$  of BM.

For collagen analysis, a colour deconvolution method was used to isolate the collagen, stained blue. This method breaks the original photograph into three images, containing three separate colour ranges. In this manner, the blue-stained areas of the images (representing collagen) could be isolated and quantified separately. The BM was traced and measured as described above. Collagen deposition immediately surrounding the airway was traced and measured, but only in images that isolated the blue-stained pixels. We could then reach a quantitative 'collagen per airway' measurement by expressing the area of blue-stained pixels per  $\mu\text{m}$  of BM.

**Pulmonary Inflammation.** Airway inflammation was assessed by differential enumeration of inflammatory cells in bronchoalveolar lavage fluid (BALF) [7, 8, 17-19]. BALF supernatants were stored at  $-20^{\circ}\text{C}$  for assessment of IL-22 protein levels. Lung sections were stained with periodic acid-Schiff (PAS) and tissue inflammation assessed by enumeration of inflammatory cells [7, 8, 17, 18]. Histopathological score was determined in lung sections stained with hematoxylin and eosin (H&E) based on established custom-designed criteria [19].

**ELISA.** Right lung lobes were homogenised on ice in 500 $\mu\text{L}$  of PBS supplemented with Complete mini protease inhibitor cocktail (Roche Diagnostic, Sydney, NSW, Australia) and PhosphoSTOP tablets (Roche Diagnostic). Lung homogenates were incubated on ice for 5 mins and subsequently centrifuged (8,000 $\times g$ , 15 mins).

Supernatants were collected, stored at -20°C overnight and total protein levels were determined using Pierce BCA assay kit (Thermo Fisher Scientific) prior to ELISA. IL-17A, IL-22, MPO and neutrophil elastase protein levels were quantified with commercially available ELISA kits (R&D Systems or Biolegend) [5]. IL-22 protein levels were normalised to total protein in lung homogenates.

**Lung Function.** Mice were anaesthetised with ketamine (100mg/kg) and xylazine (10mg/kg, Troy Laboratories, Smithfield, Australia) prior to tracheostomy. Tracheas were then cannulated and attached to Buxco® Forced Manoeuvres systems apparatus (DSI, St. Paul, Minnesota, USA) to assess total lung capacity [7, 8]. Mice were then attached to a FlexiVent apparatus (FX1 System; SCIREQ, Montreal, Canada) to assess lung volume, airway resistance, inspiratory capacity, forced vital capacity and compliance (tidal volume of 8mL/kg at a respiratory rate of 450 breaths/mins) [7, 20, 21]. All assessments were performed at least three times and the average was calculated for each mouse.

**Human lung tissue study population.** Peripheral lung samples were obtained from subjects undergoing lung resection for peripheral lung carcinoma from the Respiratory Unit of the University Hospital of Ferrara, Italy (supplementary table S4). Smokers with mild-to-moderate stable COPD (n=12) were compared with age- and smoke history-matched smokers with normal lung function (NLF) (n=12). Diagnosis of COPD was defined according to international guidelines as the presence of post-bronchodilator FEV1/FVC ratio <70% or the presence of cough and sputum production for at least 3 months in each of two consecutive years [22]. All patients were in stable condition at the time of the surgery and had not suffered acute

exacerbations or upper respiratory tract infections in the preceding two months. None had received glucocorticoids or antibiotics within the month preceding surgery, or inhaled bronchodilators within the previous 48 h. Patients had no history of asthma or other allergic diseases. All former smokers had stopped smoking for more than one year. Each patient was subjected to medical history, physical examination, chest radiography, electrocardiogram, routine blood tests, and pulmonary function tests during the week prior to surgery. Pulmonary function tests (Biomedin Spirometer, Padova, Italy) were performed as previously described [23] according to published guidelines.

**Lung sample preparation and IHC.** Collection, processing, immunohistochemical analysis of lung tissue samples as well as data analysis were performed as previously published [24, 25]. The primary antibodies (anti-human) used are summarised in supplementary table S5. Negative antibody controls used were nonspecific isotype matched Ig at their respective primary antibody concentrations. Image analysis was performed [24] using an integrated microscope (Olympus, Albertslund, Denmark), video camera (JVC Digital color, Tatstrup, Denmark), automated microscope stage (Olympus) and PC running Image pro-Plus Software (Media Cybernetics) to quantify the RBP staining areas. Immunostaining counting and interpretation were performed blinded without prior knowledge of clinical-pathologic parameters.

**Scoring system for IHC in peripheral lung.** Staining analysis was performed as previously published [24, 25]. A bronchiole was taken to be an airway with no



cartilage and glands in its wall. According to a validated method [24] the number of positively stained endoalveolar macrophages was expressed as a percentage of the total cells with the morphological appearance of alveolar macrophages counted inside of the alveoli. The number of bronchiolar epithelial cells with positive staining was expressed as a percentage of the total number of epithelial cells counted in each bronchiolar section and group data were expressed as mean and standard error of the mean (SEM). Airway epithelial-specific IL-22RA1 protein intensity was quantified using the Aperio imaging system and normalized to the length of the basement membrane.

**Statistical analyses.** Unless otherwise stated, data are presented as means  $\pm$  standard error of mean (SEM) and are representative of two independent experiments with 6 mice per group. The two-tailed Mann-Whitney test was used to compare two groups. The one-way analysis of variance with Bonferroni post-test was used to compare 3 or more groups. Statistical significance was set at  $P < 0.05$  and determined using GraphPad Prism Software version 6 (San Diego, CA, USA).

**Supplementary table S1.** Custom-designed primers used in qPCR analysis

| <b>Primer</b>          | <b>Primer sequence (5' → 3')</b> |
|------------------------|----------------------------------|
| <i>Il22ra1</i> forward | GTTTTACTACGCCAAGGTCACG           |
| <i>Il22ra1</i> reverse | CACTTTGGGGATACAGGTCACA           |
| <i>Il10rb</i> forward  | ATTCGGAGTGGGTCAATGT              |
| <i>Il10rb</i> reverse  | CTGAGAAACGCAGGTGTAAAG            |
| <i>Il22ra2</i> forward | CTCTTCTGTGACCTGACCAATGA          |
| <i>Il22ra2</i> reverse | TTATAGTCACGACCGGAGGATCT          |
| <i>Cxcl1</i> forward   | GCTGGGATTACCTCAAGAA              |
| <i>Cxcl1</i> reverse   | CTTGGGGACACCTTTTAGCA             |
| <i>Cxcl2</i> forward   | TGCTGCTGGCCACCAACCAC             |
| <i>Cxcl2</i> reverse   | AGTGTGACGCCCCCAGGACC             |
| <i>Il17a</i> forward   | GTGTCTCTGATGCTGTTGCT             |
| <i>Il17a</i> reverse   | GTTGACCTTCACATTCTGGA             |
| <i>Hprt</i> forward    | AGGCCAGACTTTGTTGGATTTGAA         |
| <i>Hprt</i> reverse    | CAACTTGCGCTCATCTTAGGATTT         |

**Supplementary table S2.** Surface antigens used to characterise mouse IL-17A<sup>+</sup> IL-22<sup>+</sup> lung cell subsets by flow cytometry

| Cell subset              | Cell surface antigens                                                                                                                                           |
|--------------------------|-----------------------------------------------------------------------------------------------------------------------------------------------------------------|
| CD4 <sup>+</sup> T cells | CD45 <sup>+</sup> CD3 <sup>+</sup> CD4 <sup>+</sup> CD8 <sup>-</sup>                                                                                            |
| $\gamma\delta$ T cells   | CD45 <sup>+</sup> CD3 <sup>+</sup> $\gamma\delta$ TCR <sup>+</sup>                                                                                              |
| NKT cells                | CD45 <sup>+</sup> CD3 <sup>+</sup> $\alpha$ GalCer tetramer <sup>+</sup>                                                                                        |
| ILC3                     | CD45 <sup>+</sup> CD3 <sup>-</sup> Ly6C/G <sup>-</sup> CD11b <sup>-</sup> B220 <sup>-</sup> TER119 <sup>-</sup> IL-7R $\alpha$ <sup>+</sup> CD90.2 <sup>+</sup> |
| IL-17A and IL-22         | Reported by eGFP and td-tomato, respectively                                                                                                                    |

**Supplementary table S3.** Antibodies used in flow cytometry analysis

| Cell surface             |          | Clone    | Fluorophore | Company   |
|--------------------------|----------|----------|-------------|-----------|
| <b>antigens</b>          |          |          |             |           |
| CD45                     |          | 30-F11   | PerCP-Cy5.5 | Biolegend |
| CD3                      |          | 17A2     | AF700       | Biolegend |
| CD4                      |          | RM4-5    | APC-Cy7     | Biolegend |
| CD8                      |          | 53-6.7   | BV510       | Biolegend |
| $\gamma\delta$ TCR       |          | GL3      | BV421       | Biolegend |
| $\alpha$ GalCer Tetramer |          | N/A      | BV605       | N/A       |
| Lineage                  | cocktail | 17A2,    | AF700       | Biolegend |
| (CD3,                    | Ly6C/G,  | RB6-8C5, |             |           |
| CD11b,                   | B220,    | M1/70,   |             |           |
| TER119)                  |          | RA3-6B2, |             |           |
|                          |          | Ter-119  |             |           |

**Supplementary Table S4.** Characteristics of subjects for the immunohistochemical study of interleukins on peripheral lung

| Subjects        | N. | Age          | Sex        | Smoking history                   | Pack-years    | Chronic bronchitis        | FEV <sub>1</sub><br>% pred | FEV <sub>1</sub> /<br>FVC % |
|-----------------|----|--------------|------------|-----------------------------------|---------------|---------------------------|----------------------------|-----------------------------|
| Control smokers | 12 | 70.8<br>±2.3 | 10M/<br>2F | 8 Ex smokers<br>4 Current smokers | 41.9<br>±11.4 | 0                         | 104.3±4.0                  | 76.7±1.3                    |
| COPD            | 12 | 72.4<br>±1.5 | 12M        | 7 Ex smokers<br>5 Current smokers | 40.6<br>±3.3  | 4 with chronic bronchitis | 76.9±6.2                   | 61.6±2.7                    |

**Supplementary table S5.** Primary antibodies and immunohistochemical conditions used for identification of interleukins in the peripheral lung

| Antigen            | Company                    | Catalogue              | Host   | Concentration | Secondary antibody                                  |
|--------------------|----------------------------|------------------------|--------|---------------|-----------------------------------------------------|
| IL10Rb             | MyBio<br>Source            | MBS2003603             | Rabbit | 1.8 µg/ml     | Goat anti-rabbit IgG,<br>Vector (BA 1000);<br>1:200 |
| IL-22              | R&D                        | AF782                  | Goat   | 4 µg/ml       | Rabbit anti-goat IgG,<br>Vector (BA 5000);<br>1:200 |
| IL22RA1<br>/ IL22R | EMD<br>Millipore/L<br>SBio | 06-1077-<br>I/LS-B1365 | Rabbit | 2.2 µg/ml     | Goat anti-rabbit IgG,<br>Vector (BA 1000);<br>1:200 |
| IL22RA2            | Atlas                      | HPA030582              | Rabbit | 1 µg/ml       | Goat anti-rabbit IgG,<br>Vector (BA 1000);<br>1:200 |

**Supplementary table S6.** Immunohistochemical percentage of peripheral lung IL-22-positive cells

| Localization and antigen | Control smokers | COPD        | Mann-Whitney test p value |
|--------------------------|-----------------|-------------|---------------------------|
| Bronchiolar epithelium   |                 |             |                           |
| Nuclear                  | 8.3±2.8         | 9.0±2.5     | 0.6427                    |
|                          | 5.0 (9.6)       | 5.0 (8.7)   |                           |
|                          | 1.0-13.8        | 2.0-18.0    |                           |
| Cytosolic                | 48.5±7.0        | 60.8±6.6    | 0.2037                    |
|                          | 54.5 (24.1)     | 67.5 (22.8) |                           |
|                          | 25.3-70.3       | 44.5-76.3   |                           |
| Alveolar macrophages     |                 |             |                           |
| Nuclear                  | 16.7±4.1        | 46.5±7.5    | 0.0130                    |
|                          | 11.5 (14.1)     | 51.0 (26.1) |                           |
| Cytosolic                | 9.0-23.0        | 28.3-63.5   | 0.0602                    |
|                          | 62.0 (20.3)     | 58.0 (13.8) |                           |

40.8-76.5

27.0-48.5

Data expressed as mean  $\pm$  SEM (first line), median (SD) (second line) and interquartile range (third line). Data expressed as mean  $\pm$  SEM (first line), median (SD) (second line) and interquartile range (third line).

**Supplementary table S7.** Immunohistochemical percentage of peripheral lung IL22RA1-positive cells

| Localization and antigen | Control smokers | COPD        | Mann-Whitney test p value |
|--------------------------|-----------------|-------------|---------------------------|
| Bronchiolar epithelium   |                 |             |                           |
| Nuclear                  | 3.8±2.3         | 24.9±4.6    | 0.0009                    |
|                          | 0.8 (7.9)       | 24.5 (15.9) |                           |
|                          | 0.0-4.0         | 16.8-27.5   |                           |
| Cytosolic                | 30.5±7.8        | 8.2±3.5     | 0.0123                    |
|                          | 21.5 (27.1)     | 2.0 (12.1)  |                           |
|                          | 7.0-57.3        | 0.0-16.8    |                           |
| Alveolar macrophages     |                 |             |                           |
| Nuclear                  | 1.9±0.9         | 20.7±4.3    | 0.0005                    |
|                          | 0.5 (3.2)       | 21.0 (15.0) |                           |
|                          | 0.0-2.8         | 5.5-35.3    |                           |
| Cytosolic                | 0.0-2.8         | 5.5-35.3    | 0.0022                    |
|                          | 72.5±3.9        | 52.0±3.9    |                           |
|                          | 75.0 (13.4)     | 49.0 (13.5) |                           |

Data expressed as mean  $\pm$  SEM (first line), median (SD) (second line) and interquartile range (third line). Data expressed as mean  $\pm$  SEM (first line), median (SD) (second line) and interquartile range (third line).

**Supplementary table S8. Immunohistochemical percentage of peripheral lung IL22RA2-positive cells**

| Localization and antigen | Control smokers | COPD        | Mann-Whitney test p value |
|--------------------------|-----------------|-------------|---------------------------|
| Bronchiolar epithelium   |                 |             |                           |
| Nuclear                  | 0               | 0           | -----                     |
|                          | 0               | 0           |                           |
|                          | 0               | 0           |                           |
| Cytosolic                | 25.7±7.0        | 11.8±3.7    | 0.1645                    |
|                          | 19.0 (24.1)     | 8.0 (12.8)  |                           |
|                          | 3.5-49.5        | 1.3-20.5    |                           |
| Alveolar macrophages     |                 |             |                           |
| Nuclear                  | 0               | 0           | -----                     |
|                          | 0               | 0           |                           |
|                          | 0               | 0           |                           |
| Cytosolic                | 47.5±5.0        | 48.2±8.5    | 0.8173                    |
|                          | 46.5 (17.5)     | 52.5 (29.3) |                           |
|                          | 34.3-59.8       | 22.5-73.3   |                           |

Data expressed as mean ± SEM (first line), median (SD) (second line) and interquartile range (third line). Data expressed as mean ± SEM (first line), median (SD) (second line) and interquartile range (third line).

**Supplementary table S9.** Immunohistochemical percentage of peripheral lung IL10Rb-positive cells

| Localization and antigen | Control smokers | COPD        | Mann-Whitney test p value |
|--------------------------|-----------------|-------------|---------------------------|
| Bronchiolar epithelium   |                 |             |                           |
| Nuclear                  | 1.8±0.8         | 3.4±1.1     | 0.1259                    |
|                          | 0.5 (2.6)       | 2.0 (3.8)   |                           |
|                          | 0.0-2.8         | 1.0-4.8     |                           |
| Cytosolic                | 27.0±7.6        | 26.9±5.3    | 0.7505                    |
|                          | 16.0 (26.5)     | 18.5 (18.4) |                           |
|                          | 2.8-58.3        | 13.0-41.8   |                           |
| Alveolar macrophages     |                 |             |                           |
| Nuclear                  | 5.5±1.7         | 19.1±3.7    | 0.0044                    |
|                          | 5.0 (5.9)       | 19.0 (12.8) |                           |
|                          | 0.0-11.8        | 7.5-25.0    |                           |
| Cytosolic                | 59.8±5.9        | 59.6±4.0    | 0.9769                    |
|                          | 62.0 (20.3)     | 58.0 (13.8) |                           |
|                          | 38.5-76.5       | 49.3-66.8   |                           |

Data expressed as mean ± SEM (first line), median (SD) (second line) and interquartile range (third line).

**Supplementary Table S10.** Characteristics of subjects for the IL-22RA1 intensity in airway epithelial cells

| Subjects                       | Non-smokers | Healthy smokers | GOLD 2   | GOLD 3, 4 |
|--------------------------------|-------------|-----------------|----------|-----------|
| Sex (M/F)                      | 2/4         | 2/4             | 6/3      | 4/5       |
| Smoking status (current/ex/NA) | 0/0/0       | 4/2/0           | 4/3/2    | 1/8/0     |
| Age (mean ± SD)                | 58.0±18.1   | 65.8±9.2        | 63.7±9.0 | 60.3±6.0  |
| FEV1/FVC % (mean ± SD)         | 82.9±4.4    | 76.5±3.5        | 57.1±5.6 | 33.5±11.1 |



## References

1. Carolan BJ, Heguy A, Harvey BG, Leopold PL, Ferris B, Crystal RG. Up-regulation of expression of the ubiquitin carboxyl-terminal hydrolase L1 gene in human airway epithelium of cigarette smokers. *Cancer research* 2006; 66(22): 10729-10740.
2. Harvey BG, Heguy A, Leopold PL, Carolan BJ, Ferris B, Crystal RG. Modification of gene expression of the small airway epithelium in response to cigarette smoking. *Journal of molecular medicine (Berlin, Germany)* 2007; 85(1): 39-53.
3. Campbell JD, McDonough JE, Zeskind JE, Hackett TL, Pechkovsky DV, Brandsma CA, Suzuki M, Gosselink JV, Liu G, Alekseyev YO, Xiao J, Zhang X, Hayashi S, Cooper JD, Timens W, Postma DS, Knight DA, Lenburg ME, Hogg JC, Spira A. A gene expression signature of emphysema-related lung destruction and its reversal by the tripeptide GHK. *Genome medicine* 2012; 4(8): 67.
4. Bhattacharya S, Srisuma S, Demeo DL, Shapiro SD, Bueno R, Silverman EK, Reilly JJ, Mariani TJ. Molecular biomarkers for quantitative and discrete COPD phenotypes. *American journal of respiratory cell and molecular biology* 2009; 40(3): 359-367.
5. Plank MW, Kaiko GE, Maltby S, Weaver J, Tay HL, Shen W, Wilson MS, Durum SK, Foster PS. Th22 Cells Form a Distinct Th Lineage from Th17 Cells In Vitro with Unique Transcriptional Properties and Tbet-Dependent Th1 Plasticity. *Journal of immunology (Baltimore, Md : 1950)* 2017; 198(5): 2182-2190.
6. Fricker M GB, Mateer S, Jones B, Kim RY, Gellatly SL, Jarnicki AG, Powell N, Oliver BG, Radford-Smith G, Talley NJ, Walker MM, Keely S, Hansbro PM. . Chronic smoke exposure induces systemic hypoxia that drives intestinal dysfunction. . *JCI insight* 2018(In Press).
7. Beckett EL, Stevens RL, Jarnicki AG, Kim RY, Hanish I, Hansbro NG, Deane A, Keely S, Horvat JC, Yang M, Oliver BG, van Rooijen N, Inman MD, Adachi R, Soberman RJ, Hamadi S, Wark PA, Foster PS, Hansbro PM. A new short-term mouse model of chronic obstructive pulmonary disease identifies a role for mast cell tryptase in pathogenesis. *The Journal of allergy and clinical immunology* 2013; 131(3): 752-762.
8. Haw TJ, Starkey MR, Pavlidis S, Fricker M, Arthurs AL, Mono Nair P, Liu G, Hanish I, Kim RY, Foster PS, Horvat JC, Adcock IM, Hansbro PM. Toll-like receptor 2 and 4 have Opposing Roles in the Pathogenesis of Cigarette Smoke-induced Chronic Obstructive Pulmonary Disease. *American journal of physiology Lung cellular and molecular physiology* 2017: ajplung.00154.02017.
9. Haw TJ, Starkey MR, Nair PM, Pavlidis S, Liu G, Nguyen DH, Hsu AC, Hanish I, Kim RY, Collison AM, Inman MD, Wark PA, Foster PS, Knight DA, Mattes J, Yagita H, Adcock IM, Horvat JC, Hansbro PM. A pathogenic role for tumor necrosis factor-related apoptosis-inducing ligand in chronic obstructive pulmonary disease. *Mucosal immunology* 2016; 9(4): 859-872.
10. Hsu AC, Starkey MR, Hanish I, Parsons K, Haw TJ, Howland LJ, Barr I, Mahony JB, Foster PS, Knight DA, Wark PA, Hansbro PM. Targeting PI3K-p110alpha Suppresses Influenza Virus Infection in Chronic Obstructive Pulmonary Disease. *American journal of respiratory and critical care medicine* 2015; 191(9): 1012-1023.
11. Hsu AC, Dua K, Starkey MR, Haw TJ, Nair PM, Nichol K, Zammit N, Grey ST, Baines KJ, Foster PS, Hansbro PM, Wark PA. MicroRNA-125a and -b inhibit A20

and MAVS to promote inflammation and impair antiviral response in COPD. *JCI insight* 2017: 2(7): e90443.

12. Liu G, Cooley MA, Jarnicki AG, Hsu AC, Nair PM, Haw TJ, Fricker M, Gellatly SL, Kim RY, Inman MD, Tjin G, Wark PA, Walker MM, Horvat JC, Oliver BG, Argraves WS, Knight DA, Burgess JK, Hansbro PM. Fibulin-1 regulates the pathogenesis of tissue remodeling in respiratory diseases. *JCI insight* 2016: 1(9).

13. Hansbro PM, Hamilton MJ, Fricker M, Gellatly SL, Jarnicki AG, Zheng D, Frei SM, Wong GW, Hamadi S, Zhou S, Foster PS, Krilis SA, Stevens RL. Importance of mast cell Prss31/transmembrane tryptase/tryptase-gamma in lung function and experimental chronic obstructive pulmonary disease and colitis. *The Journal of biological chemistry* 2014: 289(26): 18214-18227.

14. Starkey MR, Nguyen DH, Essilfie AT, Kim RY, Hatchwell LM, Collison AM, Yagita H, Foster PS, Horvat JC, Mattes J, Hansbro PM. Tumor necrosis factor-related apoptosis-inducing ligand translates neonatal respiratory infection into chronic lung disease. *Mucosal immunology* 2014: 7(3): 478-488.

15. Starkey MR, Essilfie AT, Horvat JC, Kim RY, Nguyen DH, Beagley KW, Mattes J, Foster PS, Hansbro PM. Constitutive production of IL-13 promotes early-life Chlamydia respiratory infection and allergic airway disease. *Mucosal immunology* 2013: 6(3): 569-579.

16. Kedzierski L, Tate MD, Hsu AC, Kolesnik TB, Linossi EM, Dagley L, Dong Z, Freeman S, Infusini G, Starkey MR, Bird NL, Chatfield SM, Babon JJ, Huntington N, Belz G, Webb A, Wark PA, Nicola NA, Xu J, Kedzierska K, Hansbro PM, Nicholson SE. Suppressor of cytokine signaling (SOCS)5 ameliorates influenza infection via inhibition of EGFR signaling. *eLife* 2017: 6.

17. Essilfie AT, Horvat JC, Kim RY, Mayall JR, Pinkerton JW, Beckett EL, Starkey MR, Simpson JL, Foster PS, Gibson PG, Hansbro PM. Macrolide therapy suppresses key features of experimental steroid-sensitive and steroid-insensitive asthma. *Thorax* 2015: 70(5): 458-467.

18. Nair PM, Starkey MR, Haw TJ, Liu G, Horvat JC, Morris JC, Verrills NM, Clark AR, Ammit AJ, Hansbro PM. Targeting PP2A and proteasome activity ameliorates features of allergic airway disease in mice. *Allergy* 2017: 72(12): 1891-1903.

19. Horvat JC, Beagley KW, Wade MA, Preston JA, Hansbro NG, Hickey DK, Kaiko GE, Gibson PG, Foster PS, Hansbro PM. Neonatal chlamydial infection induces mixed T-cell responses that drive allergic airway disease. *American journal of respiratory and critical care medicine* 2007: 176(6): 556-564.

20. Kim RY, Horvat JC, Pinkerton JW, Starkey MR, Essilfie AT, Mayall JR, Nair PM, Hansbro NG, Jones B, Haw TJ, Sunkara KP, Nguyen TH, Jarnicki AG, Keely S, Mattes J, Adcock IM, Foster PS, Hansbro PM. MicroRNA-21 drives severe, steroid-insensitive experimental asthma by amplifying phosphoinositide 3-kinase-mediated suppression of histone deacetylase 2. *The Journal of allergy and clinical immunology* 2017: 139(2): 519-532.

21. Kim RY, Pinkerton JW, Essilfie AT, Robertson AAB, Baines KJ, Brown AC, Mayall JR, Ali MK, Starkey MR, Hansbro NG, Hirota JA, Wood LG, Simpson JL, Knight DA, Wark PA, Gibson PG, O'Neill LAJ, Cooper MA, Horvat JC, Hansbro PM. Role for NLRP3 Inflammasome-mediated, IL-1 $\beta$ -Dependent Responses in Severe, Steroid-Resistant Asthma. *American journal of respiratory and critical care medicine* 2017: 196(3): 283-297.

22. Kirkham PA, Caramori G, Casolari P, Papi AA, Edwards M, Shamji B, Triantaphyllopoulos K, Hussain F, Pinart M, Khan Y, Heinemann L, Stevens L, Yeadon M, Barnes PJ, Chung KF, Adcock IM. Oxidative stress-induced antibodies to

carbonyl-modified protein correlate with severity of chronic obstructive pulmonary disease. *American journal of respiratory and critical care medicine* 2011; 184(7): 796-802.

23. Marwick JA, Caramori G, Casolari P, Mazzoni F, Kirkham PA, Adcock IM, Chung KF, Papi A. A role for phosphoinositol 3-kinase delta in the impairment of glucocorticoid responsiveness in patients with chronic obstructive pulmonary disease. *The Journal of allergy and clinical immunology* 2010; 125(5): 1146-1153.

24. Caramori G, Adcock IM, Casolari P, Ito K, Jazrawi E, Tsaprouni L, Villetti G, Civelli M, Carnini C, Chung KF, Barnes PJ, Papi A. Unbalanced oxidant-induced DNA damage and repair in COPD: a link towards lung cancer. *Thorax* 2011; 66(6): 521-527.

25. Tam A, Hughes M, McNagny KM, Obeidat M, Hackett TL, Leung JM, Shaipanich T, Dorscheid DR, Singhera GK, Yang CWT, Pare PD, Hogg JC, Nickle D, Sin DD. Hedgehog signaling in the airway epithelium of patients with chronic obstructive pulmonary disease. *Scientific reports* 2019; 9(1): 3353.
